# Supplementary material for: Head Position in Stroke Trial (HeadPoST) – sitting-up vs lying-flat positioning of patients with acute stroke: study protocol for a cluster randomised controlled trial
Source: PubMed Central journal article supplement (PMC4460701; doi:10.1186/s13063-015-0767-1), 2015-06-05
Supplement: 13063_2015_767_MOESM1_ESM.pdf [file 13063_2015_767_MOESM1_ESM.pdf]

Ethics Approvals obtained as of 11 May 2015

| <b>Country</b>       | <b>Name of Committee</b>                                                                                                                                                                                                                                                                                                                                                                                                                                                                                                                                                                                                                                                                                                                                                                                                                                                                                                                                                                                                                                                                                                                                                                                                                                                |
|----------------------|-------------------------------------------------------------------------------------------------------------------------------------------------------------------------------------------------------------------------------------------------------------------------------------------------------------------------------------------------------------------------------------------------------------------------------------------------------------------------------------------------------------------------------------------------------------------------------------------------------------------------------------------------------------------------------------------------------------------------------------------------------------------------------------------------------------------------------------------------------------------------------------------------------------------------------------------------------------------------------------------------------------------------------------------------------------------------------------------------------------------------------------------------------------------------------------------------------------------------------------------------------------------------|
| <b>Australia</b>     |                                                                                                                                                                                                                                                                                                                                                                                                                                                                                                                                                                                                                                                                                                                                                                                                                                                                                                                                                                                                                                                                                                                                                                                                                                                                         |
| Central Approval     | Human Research Ethics Committee Sydney Local Health District<br>Ethics Review Committee RPAH Zone.                                                                                                                                                                                                                                                                                                                                                                                                                                                                                                                                                                                                                                                                                                                                                                                                                                                                                                                                                                                                                                                                                                                                                                      |
| Local Site Approval  | Royal Prince Alfred Hospital, Research Governance<br>Concord Repatriation General Hospital, Research Governance<br>Human Research Ethics Committee Calvary Health Care Bruce                                                                                                                                                                                                                                                                                                                                                                                                                                                                                                                                                                                                                                                                                                                                                                                                                                                                                                                                                                                                                                                                                            |
| <b>Brazil</b>        |                                                                                                                                                                                                                                                                                                                                                                                                                                                                                                                                                                                                                                                                                                                                                                                                                                                                                                                                                                                                                                                                                                                                                                                                                                                                         |
| Central Approval     | Not required                                                                                                                                                                                                                                                                                                                                                                                                                                                                                                                                                                                                                                                                                                                                                                                                                                                                                                                                                                                                                                                                                                                                                                                                                                                            |
| Local Site Approvals | CEP Hospital das Clínicas da Faculdade de Medicina de Ribeirão Preto da USP<br>CEP Hospital Municipal São José, HMSJ Joinville, SC                                                                                                                                                                                                                                                                                                                                                                                                                                                                                                                                                                                                                                                                                                                                                                                                                                                                                                                                                                                                                                                                                                                                      |
| <b>Chile</b>         |                                                                                                                                                                                                                                                                                                                                                                                                                                                                                                                                                                                                                                                                                                                                                                                                                                                                                                                                                                                                                                                                                                                                                                                                                                                                         |
|                      | Comité de Ética Científico Servicio de Salud Metropolitano Sur Oriente<br>Comité de Ética Científico Servicio de Salud Metropolitano Oriente<br>Comité de Ética Científico Servicio de Salud Araucanía Sur<br>Comité de Ética de la investigación del Servicio de Salud Valdivia<br>Comité de Ética Científico Servicio de Salud Iquique<br>Comité de Ética de la Investigación Facultad de Medicina Clínica Alemana de Santiago Universidad del Desarrollo<br>Comité de Ética Científico Clínica Dávila<br>Comité de Ética Científico Servicio de Salud del Bio Bio                                                                                                                                                                                                                                                                                                                                                                                                                                                                                                                                                                                                                                                                                                    |
| <b>China</b>         |                                                                                                                                                                                                                                                                                                                                                                                                                                                                                                                                                                                                                                                                                                                                                                                                                                                                                                                                                                                                                                                                                                                                                                                                                                                                         |
| Central Approval     | The EC of The Hospital of Peking Union Medical College                                                                                                                                                                                                                                                                                                                                                                                                                                                                                                                                                                                                                                                                                                                                                                                                                                                                                                                                                                                                                                                                                                                                                                                                                  |
| Local Site Approval  | The EC of Yutian County Hospital<br>The EC of Beijing Pinggu Hospital<br>The EC of Beijing University Shougang Hospital<br>The EC of Bethune international Heping Hospital<br>The EC of Cangzhou Cenral Hospital<br>The EC of Central Hospital of Shanghai Changning District (Tongren Hospital)<br>The EC of Chifeng College affiliated hospital<br>The EC of Dalian Third People's Hospital<br>The EC of Dongguan People's Hospital<br>The EC of Dunhua City Hospital<br>The EC of Huizhou City 3rd People's Hospital<br>The EC of Liaoning Province People's Hospital<br>The EC of Nanpi County Hospital<br>The EC of People's Hospital of Hejian City<br>The EC of Qilu Hospital of Shandong University<br>The EC of Qinhuangdao Harbour Hospital<br>The EC of Shanghai 85 Hospital<br>The EC of Shijiazhuang City Central Hospital<br>The EC of The 2nd Affiliated Hospital of Suzhou University<br>The EC of The 2nd Hospital of Shandong University<br>The EC of The 2nd Hospital of Hebei Medical University<br>The EC of The 3rd Hospital of Hebei Medical University<br>The EC of The Affiliated Hospital of Shandong University (Qingdao)<br>The EC of The Chinese PLA No.263 Hospital<br>The EC of The First Affiliated Hospital of Wenzhou Medical College |

The EC of The General Hospital of Yangquan Mining Limited liability company  
The EC of The First Hospital of Harbin Medical University  
The EC of The second Hospital of Nanchang  
The EC of The third Hospital Affiliated to Guangzhou Medical University  
The EC of Wafangdian 3rd hospital  
The EC of Xuanwu Hospital Affiliated to Capital Medical University  
The EC of Yongjia County People's Hospital  
The EC of Zhucheng TCM Hospital

**Taiwan**

Central Approval Not required  
Local Site Approval Chang Gung Medical Foundation Institutional Review Board

**United Kingdom**

Central Approval Wales Research Ethics Committee 5, Bangor  
Local Site Approval Not required
